# Supplementary material for: The burden of illness in Lennox–Gastaut syndrome: a systematic literature review
Source: Springer Nature journal article supplement (doi:10.1186/s13023-023-02626-4), 2023-03-01
Supplement: MOESM1 [file 13023_2023_2626_MOESM1_ESM.pdf]

**The burden of illness in Lennox-Gastaut syndrome: a systematic literature review: search terms**

**Conceptual search purpose:** The purpose of this search to identify the evidence associated with the burden of illness in individuals with Lennox-Gastaut syndrome. The search strategy is focused on identifying epidemiological data (prevalence/incidence), resource use (costs and economic analyses) and disease burden (health related quality of life).

Database: MEDALL

Host: Ovid

Data parameters: 1946 to September 09, 2021

Date of search: 10 September 2021

| Search strategy                                                                                                                                                                                                                                | Search Narrative                                                                                                                                                                                                                                                                                                                                                                                                                                                                                                                                                                                                                                                                                                                                                                                                                                                                                                                                                                              |
|------------------------------------------------------------------------------------------------------------------------------------------------------------------------------------------------------------------------------------------------|-----------------------------------------------------------------------------------------------------------------------------------------------------------------------------------------------------------------------------------------------------------------------------------------------------------------------------------------------------------------------------------------------------------------------------------------------------------------------------------------------------------------------------------------------------------------------------------------------------------------------------------------------------------------------------------------------------------------------------------------------------------------------------------------------------------------------------------------------------------------------------------------------------------------------------------------------------------------------------------------------|
| <p>1 Lennox Gastaut Syndrome/ (393)<br/>                 2 ((Lennox\$ adj3 Gastaut\$) or "lennox\$ syndrom\$" or "petit mal variant").ti,ab,kw,kf. (1599)<br/>                 3 1 or 2 (1699)</p>                                             | <p>This cluster of terms represents the condition under review, namely: Lennox Gastaut Syndrome.</p> <p>Line 1 is the controlled indexing heading for Lennox Gastaut Syndrome (MeSH indexing indicated by /).</p> <p>Line 2 is a free-text search line. This uses a proximity marker (adj3) meaning that Lennox is searched within two words of Gastaut and in any order (e.g. Lennox WORD WORD Gastaut OR Gastaut WORD WORD Lennox). Truncation (indicated by \$) is used to identify alternate word endings such Gastaut or Gastaut's syndrome.</p> <p>The free-text lines are searched in the following fields:</p> <ul style="list-style-type: none"> <li>• ti – title;</li> <li>• ab = abstract;</li> <li>• kw = keyword;</li> <li>• kf = author key field (keywords chosen by authors).</li> </ul> <p>The condition terms were compared to existing systematic reviews to check the currency of search terms.<sup>7,8</sup> No modifications were identified following this review.</p> |
| <p>4 Epidemiologic Studies/ (8796)<br/>                 5 incidence/ or prevalence/ (570714)<br/>                 6 (Epidemiolo\$ or prevalenc\$ or incidenc\$).ti,ab,kw,kf. (1777396)<br/>                 7 4 or 5 or 6 (1935263)</p>        | <p>This cluster of terms represents a search for prevalence or incidence. The cluster is based on the search filter developed by Royle and Waugh for epidemiology studies.<sup>1</sup></p>                                                                                                                                                                                                                                                                                                                                                                                                                                                                                                                                                                                                                                                                                                                                                                                                    |
| <p>8 exp economics/ (626495)<br/>                 9 exp "Costs and Cost Analysis"/ (248953)<br/>                 10 exp Economics, Hospital/ or Financial management, hospital/ (32555)<br/>                 11 Economics, Medical/ (9151)</p> | <p>This cluster of terms represents the search for resource use. The search filter is based on the NHS CRD EED filter and it has been enhanced by comparison with the CADTH economic evaluations/costs/economic models filter.<sup>2,4</sup></p>                                                                                                                                                                                                                                                                                                                                                                                                                                                                                                                                                                                                                                                                                                                                              |

|                                                                                                                                                                                                                                                                                                                                                                                                                                                                                                                                                                                                                                                                                                                                                                                                                                                                                                                                                                                                                                                                                                                                                                                                                                                      |                                                                                                                                                                                                                                                                                                                                                                                                                                                                                                                                                                                                                                                                                                                                                                               |
|------------------------------------------------------------------------------------------------------------------------------------------------------------------------------------------------------------------------------------------------------------------------------------------------------------------------------------------------------------------------------------------------------------------------------------------------------------------------------------------------------------------------------------------------------------------------------------------------------------------------------------------------------------------------------------------------------------------------------------------------------------------------------------------------------------------------------------------------------------------------------------------------------------------------------------------------------------------------------------------------------------------------------------------------------------------------------------------------------------------------------------------------------------------------------------------------------------------------------------------------------|-------------------------------------------------------------------------------------------------------------------------------------------------------------------------------------------------------------------------------------------------------------------------------------------------------------------------------------------------------------------------------------------------------------------------------------------------------------------------------------------------------------------------------------------------------------------------------------------------------------------------------------------------------------------------------------------------------------------------------------------------------------------------------|
| <p>12 economics, nursing/ (4006)</p> <p>13 economics, pharmaceutical/ (3016)</p> <p>14 (economic* or cost or costs or costly or costing or expense or expenses or price or prices or pricing or pharmacoeconomic* or expense or expenses or CEA or CUA or CBA or CMA).ti,ab,kw,kf. (975213)</p> <p>15 (resource*1 and (allocation or utili* or using or usage or use*1)).ti,ab,kw,kf. (257393)</p> <p>16 (expenditure* not energy).ti,ab,kw,kf. (33031)</p> <p>17 (value adj1 (money or monetary)).ti,ab,kw,kf. (743)</p> <p>18 (budget* or fiscal or funding or financial or finance*).ti,ab,kw,kf. (199155)</p> <p>19 (decision* adj2 (tree* or analy* or model*)).ti,ab,kw,kf. (28696)</p> <p>20 (markov or monte carlo).ti,ab,kw,kf. (73020)</p> <p>21 ((statistical or simulation\$) adj2 model\$).ti,ab,kw,kf. (50200)</p> <p>22 8 or 9 or 10 or 11 or 12 or 13 or 14 or 15 or 16 or 17 or 18 or 19 or 20 or 21 (1790163)</p>                                                                                                                                                                                                                                                                                                                  |                                                                                                                                                                                                                                                                                                                                                                                                                                                                                                                                                                                                                                                                                                                                                                               |
| <p>23 ("Quality of Life in Childhood Epilepsy" or QOLCE).ti,ab,kw,kf. (88)</p> <p>24 ("Quality of Life in Epilepsy for Adolescents" or "QOLIE-AD-48").ti,ab,kw,kf. (27)</p> <p>25 ("The Impact of Childhood Illness Scale" or ICI).ti,ab,kw,kf. (11131)</p> <p>26 ("The Hague Restrictions in Childhood Epilepsy Scale" or HARCES).ti,ab,kw,kf. (6)</p> <p>27 ("Quality of Life in Epilepsy Inventory for Adolescents" or "QoLIE-AD-48").ti,ab,kw,kf. (27)</p> <p>28 ("Quality of Life in Pediatric Epilepsy" or QoLPES).ti,ab,kw,kf. (9)</p> <p>29 ("Quality of Life in Childhood Epilepsy" or (QoLCE or "G-QoLCE")).ti,ab,kw,kf. (88)</p> <p>30 ("Impact of Pediatric Epilepsy Scale" or IPES).ti,ab,kw,kf. (83)</p> <p>31 ("Health-Related Quality of Life Measure for Children with Epilepsy" or "CHEQoL-25").ti,ab,kw,kf. (17)</p> <p>32 DISABKIDS.ti,ab,kw,kf. (103)</p> <p>33 ("Epilepsy and Learning Disability Quality of Life" or ELDQoL).ti,ab,kw,kf. (8)</p> <p>34 ("Glasgow Epilepsy Outcome Scale" or "GEOS-YP").ti,ab,kw,kf. (7)</p> <p>35 "Impact of Epilepsy Schedule".ti,ab,kw,kf. (1)</p> <p>36 (QOLIE or QOLIE-31 or QOLIE-10).ti,ab,kw,kf. (552)</p> <p>37 "Pediatric Quality of Life Inventory or PedsQL".ti,ab,kw,kf. (0)</p> | <p>This cluster of terms represents the search for disease burden and health-related quality of life. The filter has been conceived in two parts:</p> <p>i) lines 23-37 represents condition specific instruments. These were developed from an informal scoping of intervention studies, reference to a recent review,<sup>9</sup> and the clinical knowledge of the authors.</p> <p>ii) lines 26-51 is based on Paisley and Booth's HRQoL filter, which has been compared to CADTH's filter for Health Utilities, and adapted through development by the information specialist undertaking the searches.<sup>3,4</sup></p> <p>These two parts are combined at line 67 using the Boolean connector OR, meaning that the concepts unique to both parts will be returned.</p> |

38 23 or 24 or 25 or 26 or 27 or 28 or 29 or 30 or 31 or 32 or 33 or 34 or 35 or 36 or 37 (11982)

39 (15D or 15-D or 15 dimension).ti,ab,kw,kf,ot,hw. (5649)

40 (eq-5d or eq5d or eq-5 or eq5 or EQ-5D-Y or euro qual or euroqual or euro qual5d or euroqual5d or euro qol or euroqol or euro qol5d or euroqol5d or euro quol or euroquol or euro quol5d or euroquol5d or eur qol or eurqol or eur qol5d or eur?qol or eur?qol5d or euro\$ quality of life or european qol or EQ-5D-3L).ti,ab,ot,hw,kw. (13675)

41 (sf6 or sf 6 or SF-6D or short form 6 or short-form 6 or short-form six or shortform 6 or sf six or sfsix or shortform six or short form six).ti,ab,ot,hw,kw. (3052)

42 (sf10 or sf 10 or short form 10 or short-form 10 or short-form ten or shortform 10 or sf ten or sften or shortform ten or short form ten).ti,ab,ot,hw,kw. (143)

43 (sf12 or sf 12 or short form 12 or short-form 12 or short-form twelve or shortform 12 or sf twelve of sftwelve or shortform twelve or short form twelve).ti,ab,ot,hw,kw. (6562)

44 (sf16 or sf 16 or short form 16 or short-form 16 or short-form sixteen or shortform 16 or sf sixteen or sfsixteen or shortform sixteen or short form sixteen).ti,ab,ot,hw,kw. (35)

45 (sf20 or sf 20 or short form 20 or short-form 20 or short-form twenty or shortform 20 or sf twenty of sftwenty or shortform twenty of short form twenty).ti,ab,ot,hw,kw. (418)

46 (sf36 or sf 36 or short form 36 or short-form 36 or short-form thirty six or shortform 36 or sf thirtysix or sf thirty six or shortform thirtysix or shortform thirty six or short form thirty six or short form thirtysix or short form thirty six).ti,ab,ot,hw,kw. (27662)

47 (health utilities index\$ or (hui or hui1 or hui2 or hui3 or hui4 or hui-4 or hui-1 or hui-2 or hui-3)).ti,ab,ot,hw,kw. (1983)

|                                                                                                                                                                                                                                                                                                                                                                                                                                                                                                                                                                                                                                                                                                                                                                                                                                                                                                                                                                                                                                                                                                                                                                                                                                                                                                                                                                                                                                                                                                                                                                                                                                                                                                                                                          |                                                                                                                                                                                |
|----------------------------------------------------------------------------------------------------------------------------------------------------------------------------------------------------------------------------------------------------------------------------------------------------------------------------------------------------------------------------------------------------------------------------------------------------------------------------------------------------------------------------------------------------------------------------------------------------------------------------------------------------------------------------------------------------------------------------------------------------------------------------------------------------------------------------------------------------------------------------------------------------------------------------------------------------------------------------------------------------------------------------------------------------------------------------------------------------------------------------------------------------------------------------------------------------------------------------------------------------------------------------------------------------------------------------------------------------------------------------------------------------------------------------------------------------------------------------------------------------------------------------------------------------------------------------------------------------------------------------------------------------------------------------------------------------------------------------------------------------------|--------------------------------------------------------------------------------------------------------------------------------------------------------------------------------|
| <p>48 ("time trade off" or "time tradeoff" or "time trade-off" or TTO).ti,ab,ot,hw,kw. (2028)</p> <p>49 (standard gamble\$ or SG).ti,ab,ot,hw,kw. (12070)</p> <p>50 ("discrete choice" or DCE).ti,ab,ot,hw,kw. (8142)</p> <p>51 (AQoL or "Assessment of Quality of Life").ti,ab,ot,hw,kw. (2067)</p> <p>52 Quality-Adjusted Life Years/ (13713)</p> <p>53 (HRQoL or HRQL or HQL or QoL or (quality adj3 life) or HYE or HYES or (health\$ adj3 year\$)).ti,ab,ot,hw,kw. (416018)</p> <p>54 quality of life/ (220474)</p> <p>55 value of life/ (5757)</p> <p>56 uncertainty/ (14495)</p> <p>57 (uncertain\$ or wellbeing or "well being" or rosser or "willingness to pay").tw. (296805)</p> <p>58 (utilit\$ or disutility\$).ti,ab,kw,kf. (231234)</p> <p>59 (illness state\$1 or health state\$ or health status or Quality adjusted life year\$ or QALY or QALD or qale or qtime or life year\$ or ICER or "incremental cost").ti,ab,ot,hw,kw. (197462)</p> <p>60 (burden and (disease or illness or caregiver or home)).tw. (107163)</p> <p>61 (lost adj2 (productivity or work or employment or earnings)).ti,ab,kw,kf. (3131)</p> <p>62 (((disability or diseas\$) adj3 adjust\$) or daly\$).ti,ab,kw,kf. (10374)</p> <p>63 (preference* adj3 (valu* or measur* or health or life or estimat* or elicit* or disease or score* or instrument or instruments)).ti,ab,kf,kw. (12277)</p> <p>64 (self report\$ or (patient adj report\$ adj outcome\$)).ti,ab,kw,kf. (198747)</p> <p>65 (mortality or death).ti,ab,kw,kf. (1478283)</p> <p>66 39 or 40 or 41 or 42 or 43 or 44 or 45 or 46 or 47 or 48 or 49 or 50 or 51 or 52 or 53 or 54 or 55 or 56 or 57 or 58 or 59 or 60 or 61 or 62 or 63 or 64 or 65 (2665328)</p> <p>67 38 or 66 (2674844)</p> |                                                                                                                                                                                |
| <p>68 7 or 22 or 67 (5538580)</p> <p>69 3 and 68 (323)</p>                                                                                                                                                                                                                                                                                                                                                                                                                                                                                                                                                                                                                                                                                                                                                                                                                                                                                                                                                                                                                                                                                                                                                                                                                                                                                                                                                                                                                                                                                                                                                                                                                                                                                               | <p>Line 68 combines the three concepts of this search, namely:</p> <ul style="list-style-type: none"> <li>• Line 7 (epidemiology)</li> <li>• Line 22 (resource use)</li> </ul> |

|  |                                                                                                                                                                                                                                                                                    |
|--|------------------------------------------------------------------------------------------------------------------------------------------------------------------------------------------------------------------------------------------------------------------------------------|
|  | <ul style="list-style-type: none"> <li>Line 67 (burden of disease/HRQoL)</li> </ul> <p>The Boolean connector OR is used meaning that all concepts are combined.</p> <p>Line 69 combines the condition terms (line 3) AND the search filters to complete the search in MEDLINE.</p> |
|--|------------------------------------------------------------------------------------------------------------------------------------------------------------------------------------------------------------------------------------------------------------------------------------|

Database: Embase (without conferences)

Host: Ovid

Data parameters: 1980 to 2021 Week 35

Date of search: 10 September 2021

| #  | Searches                                                                                                | Results |
|----|---------------------------------------------------------------------------------------------------------|---------|
| 1  | *Lennox Gastaut Syndrome/                                                                               | 1424    |
| 2  | ((Lennox\$ adj3 Gastaut\$) or "lennox\$ syndrom\$" or "petit mal variant").ti,ab,kw.                    | 2544    |
| 3  | 1 or 2                                                                                                  | 2974    |
| 4  | incidence/                                                                                              | 465725  |
| 5  | prevalence/                                                                                             | 798135  |
| 6  | (Epidemiolo\$ or prevalenc\$ or incidenc\$).ti,ab,kw.                                                   | 2409155 |
| 7  | 4 or 5 or 6                                                                                             | 2659622 |
| 8  | exp economic evaluation/                                                                                | 320231  |
| 9  | health-economics/                                                                                       | 29645   |
| 10 | exp health-care-cost/                                                                                   | 304430  |
| 11 | exp pharmacoeconomics/                                                                                  | 207621  |
|    | (economic* or cost or costs or costly or costing or expense or expenses or price                        |         |
| 12 | or prices or pricing or pharmacoeconomic* or expense or expenses or CEA or CUA or CBA or CMA).ti,ab,kw. | 1231979 |
| 13 | (resource*1 and (allocation or utili* or using or usage or use*1)).ti,ab,kw.                            | 337470  |
| 14 | (expenditure* not energy).ti,ab,kw.                                                                     | 43745   |
| 15 | (value adj1 (money or monetary)).ti,ab,kw.                                                              | 939     |
| 16 | (budget* or fiscal or funding or financial or finance*).ti,ab,kw.                                       | 270670  |
| 17 | (decision* adj2 (tree* or analy* or model*)).ti,ab,kw.                                                  | 39671   |
| 18 | (markov or monte carlo).ti,ab,kw.                                                                       | 81378   |
| 19 | ((statistical or simulation\$) adj2 model\$).ti,ab,kw.                                                  | 60619   |
| 20 | 8 or 9 or 10 or 11 or 12 or 13 or 14 or 15 or 16 or 17 or 18 or 19                                      | 2105339 |
| 21 | ("Quality of Life in Childhood Epilepsy" or QOLCE).ti,ab,kw.                                            | 134     |
| 22 | ("Quality of Life in Epilepsy for Adolescents" or "QOLIE-AD-48").ti,ab,kw.                              | 45      |
| 23 | ("The Impact of Childhood Illness Scale" or ICI).ti,ab,kw.                                              | 14607   |
| 24 | ("The Hague Restrictions in Childhood Epilepsy Scale" or HARCES).ti,ab,kw.                              | 11      |
| 25 | ("Quality of Life in Epilepsy Inventory for Adolescents" or "QoLIE-AD-48").ti,ab,kw.                    | 45      |

|                                                                                                                                                                                                                                                                                                                                                      |       |
|------------------------------------------------------------------------------------------------------------------------------------------------------------------------------------------------------------------------------------------------------------------------------------------------------------------------------------------------------|-------|
| 26 ("Quality of Life in Pediatric Epilepsy" or QoLPES).ti,ab,kw.                                                                                                                                                                                                                                                                                     | 12    |
| 27 ("Quality of Life in Childhood Epilepsy" or (QoLCE or "G-QoLCE")).ti,ab,kw.                                                                                                                                                                                                                                                                       | 134   |
| 28 ("Impact of Pediatric Epilepsy Scale" or IPES).ti,ab,kw.                                                                                                                                                                                                                                                                                          | 115   |
| 29 ("Health-Related Quality of Life Measure for Children with Epilepsy" or "CHEQoL-25").ti,ab,kw.                                                                                                                                                                                                                                                    | 25    |
| 30 DISABKIDS.ti,ab,kw.                                                                                                                                                                                                                                                                                                                               | 178   |
| 31 ("Epilepsy and Learning Disability Quality of Life" or ELDQoL).ti,ab,kw.                                                                                                                                                                                                                                                                          | 13    |
| 32 ("Glasgow Epilepsy Outcome Scale" or "GEOS-YP").ti,ab,kw.                                                                                                                                                                                                                                                                                         | 9     |
| 33 "Impact of Epilepsy Schedule".ti,ab,kw.                                                                                                                                                                                                                                                                                                           | 1     |
| 34 (QOLIE or QOLIE-31 or QOLIE-10).ti,ab,kw.                                                                                                                                                                                                                                                                                                         | 1092  |
| 35 "Pediatric Quality of Life Inventory or PedsQL".ti,ab,kw.                                                                                                                                                                                                                                                                                         | 0     |
| 36 21 or 22 or 23 or 24 or 25 or 26 or 27 or 28 or 29 or 30 or 31 or 32 or 33 or 34 or 35                                                                                                                                                                                                                                                            | 16162 |
| 37 (15D or 15-D or 15 dimension).ti,ab,kw.                                                                                                                                                                                                                                                                                                           | 7059  |
| (eq-5d or eq5d or eq-5 or eq5 or EQ-5D-Y or euro qual or euroqual or euro qual5d or euroqual5d or euro qol or euroqol or euro qol5d or euroqol5d or euro quol or euroquol or euro quol5d or euroquol5d or eur qol or eurqol or eur qol5d or eur qol5d or eur?qul or eur?qul5d or euro\$ quality of life or european qol or EQ-5D-3L).ti,ab,ot,hw,kw. | 26595 |
| 39 (sf6 or sf 6 or SF-6D or short form 6 or short-form 6 or short-form six or shortform 6 or sf six or sfsix or shortform six or short form six).ti,ab,ot,hw,kw.                                                                                                                                                                                     | 3949  |
| 40 (sf10 or sf 10 or short form 10 or short-form 10 or short-form ten or shortform 10 or sf ten or sften or shortform ten or short form ten).ti,ab,ot,hw,kw.                                                                                                                                                                                         | 224   |
| (sf12 or sf 12 or short form 12 or short-form 12 or short-form twelve or shortform 12 or sf twelve or sftwelve or shortform twelve or short form twelve).ti,ab,ot,hw,kw.                                                                                                                                                                             | 12504 |
| (sf16 or sf 16 or short form 16 or short-form 16 or short-form sixteen or shortform 16 or sf sixteen or sfsixteen or shortform sixteen or short form sixteen).ti,ab,ot,hw,kw.                                                                                                                                                                        | 65    |
| (sf20 or sf 20 or short form 20 or short-form 20 or short-form twenty or shortform 20 or sf twenty or sftwenty or shortform twenty or short form twenty).ti,ab,ot,hw,kw.                                                                                                                                                                             | 517   |
| (sf36 or sf 36 or short form 36 or short-form 36 or short-form thirty six or shortform 36 or sf thirtysix or sf thirty six or shortform thirtysix or shortform thirty six or short form thirty six or short form thirtysix or short form thirty six).ti,ab,ot,hw,kw.                                                                                 | 52721 |
| 45 (health utilities index\$ or (hui or hui1 or hui2 or hui3 or hui4 or hui-4 or hui-1 or hui-2 or hui-3)).ti,ab,ot,hw,kw.                                                                                                                                                                                                                           | 3744  |
| 46 ("time trade off" or "time tradeoff" or "time trade-off" or TTO).ti,ab,ot,hw,kw.                                                                                                                                                                                                                                                                  | 3028  |
| 47 (standard gamble\$ or SG).ti,ab,ot,hw,kw.                                                                                                                                                                                                                                                                                                         | 17941 |
| 48 ("discrete choice" or DCE).ti,ab,ot,hw,kw.                                                                                                                                                                                                                                                                                                        | 12285 |
| 49 (AQoL or "Assessment of Quality of Life").ti,ab,ot,hw,kw.                                                                                                                                                                                                                                                                                         | 3383  |
| 50 Quality-Adjusted Life Years/                                                                                                                                                                                                                                                                                                                      | 29703 |

|    |                                                                                                                                                                                     |         |
|----|-------------------------------------------------------------------------------------------------------------------------------------------------------------------------------------|---------|
| 51 | (HRQoL or HRQL or HQL or QoL or (quality adj3 life) or HYE or HYES or (health\$ adj3 year\$)).ti,ab,ot,hw,kw.                                                                       | 719594  |
| 52 | "quality of life"/                                                                                                                                                                  | 520565  |
| 53 | socioeconomics/                                                                                                                                                                     | 142119  |
| 54 | uncertainty/                                                                                                                                                                        | 37234   |
| 55 | (uncertain\$ or wellbeing or "well being" or rosser or "willingness to pay").tw.                                                                                                    | 377239  |
| 56 | (utilit\$ or disutility\$).ti,ab,kw.                                                                                                                                                | 319447  |
| 57 | (illness state\$1 or health state\$ or health status or Quality adjusted life year\$ or QALY or QALD or qale or qtime or life year\$ or ICER or "incremental cost").ti,ab,ot,hw,kw. | 223480  |
| 58 | (burden and (disease or illness or caregiver or home)).tw.                                                                                                                          | 175208  |
| 59 | (lost adj2 (productivity or work or employment or earnings)).ti,ab,kw.                                                                                                              | 4554    |
| 60 | ((disability or diseas\$) adj3 adjust\$) or daly\$).ti,ab,kw.                                                                                                                       | 14646   |
| 61 | (preference* adj3 (valu* or measur* or health or life or estimat* or elicit* or disease or score* or instrument or instruments)).ti,ab,kw.                                          | 15912   |
| 62 | (self report\$ or (patient adj report\$ adj outcome\$)).ti,ab,kw.                                                                                                                   | 268351  |
| 63 | (mortality or death).ti,ab,kw.                                                                                                                                                      | 2073283 |
| 64 | 37 or 38 or 39 or 40 or 41 or 42 or 43 or 44 or 45 or 46 or 47 or 48 or 49 or 50 or 51 or 52 or 53 or 54 or 55 or 56 or 57 or 58 or 59 or 60 or 61 or 62 or 63                      | 3866328 |
| 65 | 36 or 64                                                                                                                                                                            | 3878406 |
| 66 | 7 or 20 or 65                                                                                                                                                                       | 7318863 |
| 67 | 3 and 66                                                                                                                                                                            | 655     |
| 68 | (conference abstract or conference review or Conference paper).pt.                                                                                                                  | 4939746 |
| 69 | 67 not 68                                                                                                                                                                           | 438     |
| 70 | limit 69 to embase                                                                                                                                                                  | 409     |

Database: APA PsycInfo

Host: Ovid

Data parameters: 1806 to September Week 1 2021

Date of search: 10 September 2021

| #  | Searches                                                                          | Results |
|----|-----------------------------------------------------------------------------------|---------|
| 1  | Lennox Gastaut Syndrome/                                                          | 118     |
| 2  | ((Lennox\$ adj3 Gastaut\$) or "lennox\$ syndrom\$" or "petit mal variant").ti,ab. | 326     |
| 3  | 1 or 2                                                                            | 335     |
| 4  | incidence/                                                                        | 0       |
| 5  | prevalence/                                                                       | 0       |
| 6  | (Epidemiolo\$ or prevalenc\$ or incidenc\$).ti,ab.                                | 203926  |
| 7  | 4 or 5 or 6                                                                       | 203926  |
| 8  | exp economic evaluation/                                                          | 0       |
| 9  | health-economics/                                                                 | 1021    |
| 10 | exp health-care-cost/                                                             | 23522   |
| 11 | exp pharmacoeconomics/                                                            | 282     |

|                                                                                                                                                                                                                                                                                                                                                            |        |
|------------------------------------------------------------------------------------------------------------------------------------------------------------------------------------------------------------------------------------------------------------------------------------------------------------------------------------------------------------|--------|
| (economic* or cost or costs or costly or costing or expense or expenses or price<br>12 or prices or pricing or pharmacoeconomic* or expense or expenses or CEA or<br>CUA or CBA or CMA).ti,ab.                                                                                                                                                             | 237930 |
| 13 (resource*1 and (allocation or utili* or using or usage or use*1)).ti,ab.                                                                                                                                                                                                                                                                               | 102603 |
| 14 (expenditure* not energy).ti,ab.                                                                                                                                                                                                                                                                                                                        | 8651   |
| 15 (value adj1 (money or monetary)).ti,ab.                                                                                                                                                                                                                                                                                                                 | 465    |
| 16 (budget* or fiscal or funding or financial or finance*).ti,ab.                                                                                                                                                                                                                                                                                          | 84803  |
| 17 (decision* adj2 (tree* or analy* or model*)).ti,ab.                                                                                                                                                                                                                                                                                                     | 9427   |
| 18 (markov or monte carlo).ti,ab.                                                                                                                                                                                                                                                                                                                          | 7981   |
| 19 ((statistical or simulation\$) adj2 model\$).ti,ab.                                                                                                                                                                                                                                                                                                     | 8078   |
| 20 8 or 9 or 10 or 11 or 12 or 13 or 14 or 15 or 16 or 17 or 18 or 19                                                                                                                                                                                                                                                                                      | 416669 |
| 21 ("Quality of Life in Childhood Epilepsy" or QOLCE).ti,ab.                                                                                                                                                                                                                                                                                               | 51     |
| 22 ("Quality of Life in Epilepsy for Adolescents" or "QOLIE-AD-48").ti,ab.                                                                                                                                                                                                                                                                                 | 19     |
| 23 ("The Impact of Childhood Illness Scale" or ICI).ti,ab.                                                                                                                                                                                                                                                                                                 | 1137   |
| 24 ("The Hague Restrictions in Childhood Epilepsy Scale" or HARCES).ti,ab.                                                                                                                                                                                                                                                                                 | 5      |
| 25 ("Quality of Life in Epilepsy Inventory for Adolescents" or "QoLIE-AD-<br>48").ti,ab.                                                                                                                                                                                                                                                                   | 18     |
| 26 ("Quality of Life in Pediatric Epilepsy" or QoLPES).ti,ab.                                                                                                                                                                                                                                                                                              | 10     |
| 27 ("Quality of Life in Childhood Epilepsy" or (QoLCE or "G-QoLCE")).ti,ab.                                                                                                                                                                                                                                                                                | 51     |
| 28 ("Impact of Pediatric Epilepsy Scale" or IPES).ti,ab.                                                                                                                                                                                                                                                                                                   | 31     |
| 29 ("Health-Related Quality of Life Measure for Children with Epilepsy" or<br>"CHEQoL-25").ti,ab.                                                                                                                                                                                                                                                          | 14     |
| 30 DISABKIDS.ti,ab.                                                                                                                                                                                                                                                                                                                                        | 43     |
| 31 ("Epilepsy and Learning Disability Quality of Life" or ELDQoL).ti,ab.                                                                                                                                                                                                                                                                                   | 5      |
| 32 ("Glasgow Epilepsy Outcome Scale" or "GEOS-YP").ti,ab.                                                                                                                                                                                                                                                                                                  | 6      |
| 33 "Impact of Epilepsy Schedule".ti,ab.                                                                                                                                                                                                                                                                                                                    | 0      |
| 34 (QOLIE or QOLIE-31 or QOLIE-10).ti,ab.                                                                                                                                                                                                                                                                                                                  | 328    |
| 35 "Pediatric Quality of Life Inventory or PedsQL".ti,ab.                                                                                                                                                                                                                                                                                                  | 0      |
| 36 21 or 22 or 23 or 24 or 25 or 26 or 27 or 28 or 29 or 30 or 31 or 32 or 33 or 34 or<br>35                                                                                                                                                                                                                                                               | 1615   |
| 37 (15D or 15-D or 15 dimension).ti,ab.                                                                                                                                                                                                                                                                                                                    | 272    |
| (eq-5d or eq5d or eq-5 or eq5 or EQ-5D-Y or euro qual or euroqual or euro<br>qual5d or euroqual5d or euro qol or euroqol or euro qol5d or euroqol5d or euro<br>38 quol or euroquol or euro quol5d or euroquol5d or eur qol or eurqol or eur qol5d<br>or eur qol5d or eur?qul or eur?qul5d or euro\$ quality of life or european qol or<br>EQ-5D-3L).ti,ab. | 2635   |
| 39 (sf6 or sf 6 or SF-6D or short form 6 or short-form 6 or short-form six or<br>shortform 6 or sf six or sfsix or shortform six or short form six).ti,ab.                                                                                                                                                                                                 | 347    |
| 40 (sf10 or sf 10 or short form 10 or short-form 10 or short-form ten or shortform<br>10 or sf ten or sften or shortform ten or short form ten).ti,ab.                                                                                                                                                                                                     | 20     |
| (sf12 or sf 12 or short form 12 or short-form 12 or short-form twelve or<br>41 shortform 12 or sf twelve of sftwelve or shortform twelve or short form<br>twelve).ti,ab.                                                                                                                                                                                   | 1552   |



|    |                                                                                                                                                                                                                                                             |        |
|----|-------------------------------------------------------------------------------------------------------------------------------------------------------------------------------------------------------------------------------------------------------------|--------|
| 42 | (sf16 or sf 16 or short form 16 or short-form 16 or short-form sixteen or shortform 16 or sf sixteen or sfsixteen or shortform sixteen or short form sixteen).ti,ab.                                                                                        | 4      |
| 43 | (sf20 or sf 20 or short form 20 or short-form 20 or short-form twenty or shortform 20 or sf twenty of sftwenty or shortform twenty of short form twenty).ti,ab.                                                                                             | 61     |
| 44 | (sf36 or sf 36 or short form 36 or short-form 36 or short-form thirty six or shortform 36 or sf thirtysix or sf thirty six or shortform thirtysix or shortform thirty six or short form thirty six or short form thirtysix or short form thirty six).ti,ab. | 5566   |
| 45 | (health utilities index\$ or (hui or hui1 or hui2 or hui3 or hui4 or hui-4 or hui-1 or hui-2 or hui-3)).ti,ab.                                                                                                                                              | 687    |
| 46 | ("time trade off" or "time tradeoff" or "time trade-off" or TTO).ti,ab.                                                                                                                                                                                     | 428    |
| 47 | (standard gamble\$ or SG).ti,ab.                                                                                                                                                                                                                            | 1071   |
| 48 | ("discrete choice" or DCE).ti,ab.                                                                                                                                                                                                                           | 1252   |
| 49 | (AQoL or "Assessment of Quality of Life").ti,ab.                                                                                                                                                                                                            | 593    |
| 50 | Quality-Adjusted Life Years/                                                                                                                                                                                                                                | 0      |
| 51 | (HRQoL or HRQL or HQL or QoL or (quality adj3 life) or HYE or HYES or (health\$ adj3 year\$)).ti,ab.                                                                                                                                                        | 81246  |
| 52 | "quality of life"/                                                                                                                                                                                                                                          | 43216  |
| 53 | socioeconomics/                                                                                                                                                                                                                                             | 0      |
| 54 | uncertainty/                                                                                                                                                                                                                                                | 9685   |
| 55 | (uncertain\$ or wellbeing or "well being" or rosser or "willingness to pay").tw.                                                                                                                                                                            | 156067 |
| 56 | (utilit\$ or disutility\$).ti,ab.                                                                                                                                                                                                                           | 63622  |
| 57 | (illness state\$1 or health state\$ or health status or Quality adjusted life year\$ or QALY or QALD or qale or qtime or life year\$ or ICER or "incremental cost").ti,ab.                                                                                  | 23031  |
| 58 | (burden and (disease or illness or caregiver or home)).tw.                                                                                                                                                                                                  | 20052  |
| 59 | (lost adj2 (productivity or work or employment or earnings)).ti,ab.                                                                                                                                                                                         | 856    |
| 60 | ((disability or diseas\$) adj3 adjust\$) or daly\$).ti,ab.                                                                                                                                                                                                  | 2023   |
| 61 | (preference* adj3 (valu* or measur* or health or life or estimat* or elicite* or disease or score* or instrument or instruments)).ti,ab.                                                                                                                    | 8210   |
| 62 | [(self report\$ or (patient adj report\$ adj outcome\$)).ti,ab,kw.]                                                                                                                                                                                         | 0      |
| 63 | (mortality or death).ti,ab.                                                                                                                                                                                                                                 | 117895 |
| 64 | 37 or 38 or 39 or 40 or 41 or 42 or 43 or 44 or 45 or 46 or 47 or 48 or 49 or 50 or 51 or 52 or 53 or 54 or 55 or 56 or 57 or 58 or 59 or 60 or 61 or 62 or 63                                                                                              | 435194 |
| 65 | 36 or 64                                                                                                                                                                                                                                                    | 436260 |
| 66 | 7 or 20 or 65                                                                                                                                                                                                                                               | 941439 |
| 67 | 3 and 66                                                                                                                                                                                                                                                    | 77     |

Database: Cochrane CDSR

Host: Wiley

Data parameters: Issue 9 of 12, September 2021

Date of search: 10 September 2021

| ID | Search Hits                                                                |     |
|----|----------------------------------------------------------------------------|-----|
| #1 | MeSH descriptor: [Lennox Gastaut Syndrome] this term only                  | 33  |
| #2 | ((Lennox* Gastaut*) or "lennox* syndrom*" or "petit mal variant"):ti,ab,kw | 271 |
| #3 | #1 or #2                                                                   | 271 |

NB: search retrieved 271 across the Cochrane Library platform. Three (3) of these results were from CDSR, which were downloaded.

Database: Epistemonikos

Host: <https://www.epistemonikos.org/>

Date of search: 10 September 2021

Lennox Gastaut Syndrome

Database: Embase (limited to conferences 2018-current)

Host: Ovid

Data parameters: 1980 to 2021 Week 35

Date of search: 10 September 2021

| #  | Searches                                                                                                   | Results |
|----|------------------------------------------------------------------------------------------------------------|---------|
| 1  | *Lennox Gastaut Syndrome/                                                                                  | 1424    |
| 2  | ((Lennox\$ adj3 Gastaut\$) or "lennox\$ syndrom\$" or "petit mal variant").ti,ab,kw.                       | 2544    |
| 3  | 1 or 2                                                                                                     | 2974    |
| 4  | incidence/                                                                                                 | 465725  |
| 5  | prevalence/                                                                                                | 798135  |
| 6  | (Epidemiolo\$ or prevalenc\$ or incidenc\$).ti,ab,kw.                                                      | 2409155 |
| 7  | 4 or 5 or 6                                                                                                | 2659622 |
| 8  | exp economic evaluation/                                                                                   | 320231  |
| 9  | health-economics/                                                                                          | 29645   |
| 10 | exp health-care-cost/                                                                                      | 304430  |
| 11 | exp pharmacoeconomics/<br>(economic* or cost or costs or costly or costing or expense or expenses or price | 207621  |
| 12 | or prices or pricing or pharmacoeconomic* or expense or expenses or CEA or CUA or CBA or CMA).ti,ab,kw.    | 1231979 |
| 13 | (resource*1 and (allocation or utili* or using or usage or use*1)).ti,ab,kw.                               | 337470  |
| 14 | (expenditure* not energy).ti,ab,kw.                                                                        | 43745   |
| 15 | (value adj1 (money or monetary)).ti,ab,kw.                                                                 | 939     |
| 16 | (budget* or fiscal or funding or financial or finance*).ti,ab,kw.                                          | 270670  |
| 17 | (decision* adj2 (tree* or analy* or model*)).ti,ab,kw.                                                     | 39671   |
| 18 | (markov or monte carlo).ti,ab,kw.                                                                          | 81378   |
| 19 | ((statistical or simulation\$) adj2 model\$).ti,ab,kw.                                                     | 60619   |
| 20 | 8 or 9 or 10 or 11 or 12 or 13 or 14 or 15 or 16 or 17 or 18 or 19                                         | 2105339 |

|    |                                                                                                                                                                                                                                                                                                                                                      |       |
|----|------------------------------------------------------------------------------------------------------------------------------------------------------------------------------------------------------------------------------------------------------------------------------------------------------------------------------------------------------|-------|
| 21 | ("Quality of Life in Childhood Epilepsy" or QOLCE).ti,ab,kw.                                                                                                                                                                                                                                                                                         | 134   |
| 22 | ("Quality of Life in Epilepsy for Adolescents" or "QOLIE-AD-48").ti,ab,kw.                                                                                                                                                                                                                                                                           | 45    |
| 23 | ("The Impact of Childhood Illness Scale" or ICI).ti,ab,kw.                                                                                                                                                                                                                                                                                           | 14607 |
| 24 | ("The Hague Restrictions in Childhood Epilepsy Scale" or HARCES).ti,ab,kw.                                                                                                                                                                                                                                                                           | 11    |
| 25 | ("Quality of Life in Epilepsy Inventory for Adolescents" or "QoLIE-AD-48").ti,ab,kw.                                                                                                                                                                                                                                                                 | 45    |
| 26 | ("Quality of Life in Pediatric Epilepsy" or QoLPES).ti,ab,kw.                                                                                                                                                                                                                                                                                        | 12    |
| 27 | ("Quality of Life in Childhood Epilepsy" or (QoLCE or "G-QoLCE")).ti,ab,kw.                                                                                                                                                                                                                                                                          | 134   |
| 28 | ("Impact of Pediatric Epilepsy Scale" or IPES).ti,ab,kw.                                                                                                                                                                                                                                                                                             | 115   |
| 29 | ("Health-Related Quality of Life Measure for Children with Epilepsy" or "CHEQoL-25").ti,ab,kw.                                                                                                                                                                                                                                                       | 25    |
| 30 | DISABKIDS.ti,ab,kw.                                                                                                                                                                                                                                                                                                                                  | 178   |
| 31 | ("Epilepsy and Learning Disability Quality of Life" or ELDQoL).ti,ab,kw.                                                                                                                                                                                                                                                                             | 13    |
| 32 | ("Glasgow Epilepsy Outcome Scale" or "GEOS-YP").ti,ab,kw.                                                                                                                                                                                                                                                                                            | 9     |
| 33 | "Impact of Epilepsy Schedule".ti,ab,kw.                                                                                                                                                                                                                                                                                                              | 1     |
| 34 | (QOLIE or QOLIE-31 or QOLIE-10).ti,ab,kw.                                                                                                                                                                                                                                                                                                            | 1092  |
| 35 | "Pediatric Quality of Life Inventory or PedsQL".ti,ab,kw.                                                                                                                                                                                                                                                                                            | 0     |
| 36 | 21 or 22 or 23 or 24 or 25 or 26 or 27 or 28 or 29 or 30 or 31 or 32 or 33 or 34 or 35                                                                                                                                                                                                                                                               | 16162 |
| 37 | (15D or 15-D or 15 dimension).ti,ab,kw.                                                                                                                                                                                                                                                                                                              | 7059  |
| 38 | (eq-5d or eq5d or eq-5 or eq5 or EQ-5D-Y or euro qual or euroqual or euro qual5d or euroqual5d or euro qol or euroqol or euro qol5d or euroqol5d or euro quol or euroquol or euro quol5d or euroquol5d or eur qol or eurqol or eur qol5d or eur qol5d or eur?qul or eur?qul5d or euro\$ quality of life or european qol or EQ-5D-3L).ti,ab,ot,hw,kw. | 26595 |
| 39 | (sf6 or sf 6 or SF-6D or short form 6 or short-form 6 or short-form six or shortform 6 or sf six or sfsix or shortform six or short form six).ti,ab,ot,hw,kw.                                                                                                                                                                                        | 3949  |
| 40 | (sf10 or sf 10 or short form 10 or short-form 10 or short-form ten or shortform 10 or sf ten or sften or shortform ten or short form ten).ti,ab,ot,hw,kw.                                                                                                                                                                                            | 224   |
| 41 | (sf12 or sf 12 or short form 12 or short-form 12 or short-form twelve or shortform 12 or sf twelve or sftwelve or shortform twelve or short form twelve).ti,ab,ot,hw,kw.                                                                                                                                                                             | 12504 |
| 42 | (sf16 or sf 16 or short form 16 or short-form 16 or short-form sixteen or shortform 16 or sf sixteen or sfsixteen or shortform sixteen or short form sixteen).ti,ab,ot,hw,kw.                                                                                                                                                                        | 65    |
| 43 | (sf20 or sf 20 or short form 20 or short-form 20 or short-form twenty or shortform 20 or sf twenty or sftwenty or shortform twenty or short form twenty).ti,ab,ot,hw,kw.                                                                                                                                                                             | 517   |
| 44 | (sf36 or sf 36 or short form 36 or short-form 36 or short-form thirty six or shortform 36 or sf thirtysix or sf thirty six or shortform thirtysix or shortform thirty six or short form thirty six or short form thirtysix or short form thirty six).ti,ab,ot,hw,kw.                                                                                 | 52721 |
| 45 | (health utilities index\$ or (hui or hui1 or hui2 or hui3 or hui4 or hui-4 or hui-1 or hui-2 or hui-3)).ti,ab,ot,hw,kw.                                                                                                                                                                                                                              | 3744  |

|                                                                                                                                                                   |         |
|-------------------------------------------------------------------------------------------------------------------------------------------------------------------|---------|
| 46 ("time trade off" or "time tradeoff" or "time trade-off" or TTO).ti,ab,ot,hw,kw.                                                                               | 3028    |
| 47 (standard gamble\$ or SG).ti,ab,ot,hw,kw.                                                                                                                      | 17941   |
| 48 ("discrete choice" or DCE).ti,ab,ot,hw,kw.                                                                                                                     | 12285   |
| 49 (AQoL or "Assessment of Quality of Life").ti,ab,ot,hw,kw.                                                                                                      | 3383    |
| 50 Quality-Adjusted Life Years/                                                                                                                                   | 29703   |
| 51 (HRQoL or HRQL or HQL or QoL or (quality adj3 life) or HYE or HYES or (health\$ adj3 year\$)).ti,ab,ot,hw,kw.                                                  | 719594  |
| 52 "quality of life"/                                                                                                                                             | 520565  |
| 53 socioeconomics/                                                                                                                                                | 142119  |
| 54 uncertainty/                                                                                                                                                   | 37234   |
| 55 (uncertain\$ or wellbeing or "well being" or rosser or "willingness to pay").tw.                                                                               | 377239  |
| 56 (utilit\$ or disutility\$).ti,ab,kw.                                                                                                                           | 319447  |
| (illness state\$1 or health state\$ or health status or Quality adjusted life year\$ or                                                                           |         |
| 57 QALY or QALD or qale or qtime or life year\$ or ICER or "incremental cost").ti,ab,ot,hw,kw.                                                                    | 223480  |
| 58 (burden and (disease or illness or caregiver or home)).tw.                                                                                                     | 175208  |
| 59 (lost adj2 (productivity or work or employment or earnings)).ti,ab,kw.                                                                                         | 4554    |
| 60 (((disability or diseas\$) adj3 adjust\$) or daly\$).ti,ab,kw.                                                                                                 | 14646   |
| 61 (preference* adj3 (valu* or measur* or health or life or estimat* or elicit* or disease or score* or instrument or instruments)).ti,ab,kw.                     | 15912   |
| 62 (self report\$ or (patient adj report\$ adj outcome\$)).ti,ab,kw.                                                                                              | 268351  |
| 63 (mortality or death).ti,ab,kw.                                                                                                                                 | 2073283 |
| 64 37 or 38 or 39 or 40 or 41 or 42 or 43 or 44 or 45 or 46 or 47 or 48 or 49 or 50 or 51 or 52 or 53 or 54 or 55 or 56 or 57 or 58 or 59 or 60 or 61 or 62 or 63 | 3866328 |
| 65 36 or 64                                                                                                                                                       | 3878406 |
| 66 7 or 20 or 65                                                                                                                                                  | 7318863 |
| 67 3 and 66                                                                                                                                                       | 655     |
| 68 (conference abstract or conference review or Conference paper).pt.                                                                                             | 4939746 |
| 69 67 and 68                                                                                                                                                      | 217     |
| 70 (2018* or 2019* or 2020* or 2021*).yr.                                                                                                                         | 6288177 |
| 71 69 and 70                                                                                                                                                      | 40      |
