# Supplementary material for: The burden of illness in Lennox–Gastaut syndrome: a systematic literature review
Source: Orphanet J Rare Dis. 2023 Mar 1;18:42. doi: 10.1186/s13023-023-02626-4 (PMC9979426; doi:10.1186/s13023-023-02626-4)
Supplement: Supplementary file 2 — Additional file 2. Supplementary Table S1: Healthcare resource utilization and costs in patients with LGS; Table S2: Quality assessment checklist for prevalence studies; Table S3: Quality assessment checklist of cost-of-illness studies; Table S4: Quality assessment checklist for qualitative HRQoL studies; Table S5: HRQoL: Quality assessment checklist for quantitative HRQoL studies. [file 13023_2023_2626_MOESM2_ESM.pdf]

Supplementary Table S1: Healthcare resource utilization and costs in patients with LGS

| Study, country & type of study                                                                                   | Patient population                                                                                                                                                                                                                                             | Healthcare resource                                                                                                                                                                                                                                                                                                                                                                                                                                                                                                                                                                                                                                                                                                                                                                                                                       | Costs                                                                                                                                                                                                                                                                                                                                                                                       |
|------------------------------------------------------------------------------------------------------------------|----------------------------------------------------------------------------------------------------------------------------------------------------------------------------------------------------------------------------------------------------------------|-------------------------------------------------------------------------------------------------------------------------------------------------------------------------------------------------------------------------------------------------------------------------------------------------------------------------------------------------------------------------------------------------------------------------------------------------------------------------------------------------------------------------------------------------------------------------------------------------------------------------------------------------------------------------------------------------------------------------------------------------------------------------------------------------------------------------------------------|---------------------------------------------------------------------------------------------------------------------------------------------------------------------------------------------------------------------------------------------------------------------------------------------------------------------------------------------------------------------------------------------|
| Piña-Garza 2017 [35]<br>USA<br>(Full)<br>Retrospective insurance claims analysis                                 | Probable LGS patients (N=14,712) vs non-LGS patients (N=353,281)                                                                                                                                                                                               | <i>Mean (SD) in LGS vs non-LGS (PPPY)</i><br>Outpatient visits: 11.8 (24.1) vs 9.0 (20.7)<br>Inpatient visits: 0.6 (1.5) vs 0.6 (1.7)<br>Emergency department visits: 1.4 (4.5) vs 1.3 (4.1)<br>EEG procedures: 0.3 (0.7) vs 0.1 (0.4)<br>Neurological procedures: 1.0 (1.9) vs 0.3 (1.0)<br>Use of wheelchair or walker: 0.1 (0.4) vs 0.0 (0.4)<br>ASMs:<br>Number of ASMs received: 5.8 (2.3) vs 1.8 (1.3)<br>≥1 claim for an ASM: 62.6%–82.3%                                                                                                                                                                                                                                                                                                                                                                                          | <i>Mean, LGS vs non-LGS (PPPY)</i><br>Total healthcare costs: \$28,461–\$40,193 vs \$7170–\$25,901<br><i>LGS: Costs across 10-year age cohorts PPPY</i><br>Medical costs: \$25,303–\$37,342<br>Home-based care: 1-18 years: \$12,396 to \$18,360; 60-year-old cohort: \$6978<br>Long-term care: 1-18 years: \$1648 to \$5933; 60-year-old cohort: \$16,215<br>Pharmacy costs: \$1592–\$5630 |
| Strzelczyk 2021 [36]<br>Germany<br>(Full)<br>Retrospective insurance claims analysis                             | Narrow LGS (N=208; 1379 patient-years)                                                                                                                                                                                                                         | Annual hospital admissions (PPPY): mean (SD; median [range]): 1.6 (2.0; 1 [0–13])<br><br>LOS: mean (SD; median [range]) (PPPY): 22.7 (46.0; 3 [0–804]) days                                                                                                                                                                                                                                                                                                                                                                                                                                                                                                                                                                                                                                                                               | <i>Mean (PPPY)</i><br>Total cost of healthcare: €22,787<br>Inpatient care: €7422 (proportion of total healthcare costs: 33%)<br>Outpatient care: €1390 (6%)<br>Medication: €2243 (10%)<br>ASMs alone: €309<br>Services and devices: €11,731 (51%)<br>Intensive home nursing care (€1971) and home nursing care (€985): €2956 (13%)                                                          |
| Chin 2021 [29]<br>UK<br>(Full)<br>Retrospective analysis of electronic medical records from healthcare databases | Confirmed LGS<br>Primary care <12 years (N=39) vs ≥ 12 years (N=89)<br>Secondary care <12 years (N=20) vs ≥ 12 years (N=55)<br><br>Probable LGS<br>Primary care <12 years (N=71) vs ≥ 12 years (N=115)<br>Secondary care <12 years (N=23) vs ≥ 12 years (N=47) | <i>Mean (SD) &lt; 12 years vs ≥ 12 years (PPPY)</i><br><i>Confirmed LGS</i><br>Primary care consultations: 6.46 (4.82) vs 6.79 (7.19)<br>Hospital outpatient visits: 7.45 (9.51) vs 5.36 (7.61)<br>Hospital inpatient admissions:<br>-All cause: 1.65 (1.63) vs 1.09 (1.86)<br>- Epilepsy-related: 1.50 (1.47) vs 0.96 (1.78)<br>ED visits: 0.85 (1.18) vs 1.15 (2.17)<br><br>LOS, days<br>-All causes: 2.41 (5.87) vs 3.42 (8.53) days<br>- Epilepsy-related: 2.48 (6.07) vs 3.24 (6.80)<br><br>Mean (SD) number of ASMs over follow-up period: 6.7 (3.4)<br>Mean (SD [range]) number of ASMs per year: 1.06 (0.27 [0.25–1.5]) during 2010–13 and 1.12 (0.39 [0.25–2.0]) during 2014–17<br><br><i>Probable LGS</i><br>Primary care consultations: 7.75 (5.37) vs 7.99 (7.08)<br>Hospital outpatient visits: 10.04 (10.49) vs 7.13 (7.48) | NR                                                                                                                                                                                                                                                                                                                                                                                          |

| Study, country & type of study                                            | Patient population                                                                                                                                                                                                                                                                                                                                        | Healthcare resource                                                                                                                                                                                                                                                                                                                                                                                                                                                                                                                                                                                                                                                                                                                                                                                                                                                                                                                                                                                                                                                                                                                                                                                                                                                                                                                                                                                                                                                                                                                                                                                                                               | Costs                                                                                                                                                                                                                                                                                                                                                                                                                                                                                                                                                                                                                                                                                                                                                                                                                                                                                                                                                                                                                                                                                                                                                                                                                                                                                                                                                                                                                                                                                                                                                                                                                                                                                                                                                                                                                                                                         |
|---------------------------------------------------------------------------|-----------------------------------------------------------------------------------------------------------------------------------------------------------------------------------------------------------------------------------------------------------------------------------------------------------------------------------------------------------|---------------------------------------------------------------------------------------------------------------------------------------------------------------------------------------------------------------------------------------------------------------------------------------------------------------------------------------------------------------------------------------------------------------------------------------------------------------------------------------------------------------------------------------------------------------------------------------------------------------------------------------------------------------------------------------------------------------------------------------------------------------------------------------------------------------------------------------------------------------------------------------------------------------------------------------------------------------------------------------------------------------------------------------------------------------------------------------------------------------------------------------------------------------------------------------------------------------------------------------------------------------------------------------------------------------------------------------------------------------------------------------------------------------------------------------------------------------------------------------------------------------------------------------------------------------------------------------------------------------------------------------------------|-------------------------------------------------------------------------------------------------------------------------------------------------------------------------------------------------------------------------------------------------------------------------------------------------------------------------------------------------------------------------------------------------------------------------------------------------------------------------------------------------------------------------------------------------------------------------------------------------------------------------------------------------------------------------------------------------------------------------------------------------------------------------------------------------------------------------------------------------------------------------------------------------------------------------------------------------------------------------------------------------------------------------------------------------------------------------------------------------------------------------------------------------------------------------------------------------------------------------------------------------------------------------------------------------------------------------------------------------------------------------------------------------------------------------------------------------------------------------------------------------------------------------------------------------------------------------------------------------------------------------------------------------------------------------------------------------------------------------------------------------------------------------------------------------------------------------------------------------------------------------------|
|                                                                           |                                                                                                                                                                                                                                                                                                                                                           | <p>Hospital inpatient admissions:<br/>           -All cause: 3.61 (4.85) vs 1.26 (2.06)<br/>           - Epilepsy-related: 3.04 (4.43) vs 0.89 (1.37)<br/>           A&amp;E visits: 0.96 (1.69) vs 1.04 (2.54)</p> <p>LOS, days<br/>           -All causes: 3.53 (11.06) vs 4.74 (11.94) days<br/>           - Epilepsy-related: 3.69 (11.98) vs 5.70 (13.90)</p> <p>Mean (SD [range]) number of ASMs per year: 1.06 (0.27 [0.25–1.5]) during 2010–13 and 1.22 (0.48 [0.25–3.25]) during 2014–17</p>                                                                                                                                                                                                                                                                                                                                                                                                                                                                                                                                                                                                                                                                                                                                                                                                                                                                                                                                                                                                                                                                                                                                             |                                                                                                                                                                                                                                                                                                                                                                                                                                                                                                                                                                                                                                                                                                                                                                                                                                                                                                                                                                                                                                                                                                                                                                                                                                                                                                                                                                                                                                                                                                                                                                                                                                                                                                                                                                                                                                                                               |
| Reaven 2018 [43]<br>USA (Full)<br>Retrospective insurance claims analysis | <p><i>Commercial:</i> Probable LGS patients (N=2270) vs control (N=2270)<br/> <i>Medicaid:</i> Probable LGS patients (N=3749) vs control (N=3749)<br/>           Control= Patients lacking diagnoses of epilepsy or seizures and outpatient claims for any selected ASMs matched for age, sex, one of four US geographic regions, and insurance type.</p> | <p><i>Mean (SD) in LGS vs control (PPPY)</i></p> <p><i>Commercial: Probable LGS patients vs control</i><br/>           (p&lt;0.0001 for all comparisons)<br/>           Inpatient admissions: 0.7 (1.1) vs 0 (0.1)<br/>           ED visits w/o Admission: 1.1 (1.6) vs 0.2 (0.5)<br/>           Hospital OP visits: 8.2 (22.2) vs 0.5 (1.3)<br/>           Physician visits: 13.5 (19.6) vs 3.8 (5.7)<br/>           Other OP: 9.6 (19.6) vs 1.5 (4.4)<br/>           Home health: 16.2 (46.8) vs 0.1 (1.5)<br/>           Equipment/ supply: 4.0 (9.3) vs 0.1 (0.4)<br/>           ASMs: 23.1 (14.5) vs 0.0 (0.3)<br/>           Rescue ASMs: 1.5 (4.4) vs 0.0 (0.0)<br/>           Other drugs: 22.3 (26.1) vs 3.8 (6.1)<br/>           Total services: 53.4 (71.2) vs 6.2 (9.0)<br/>           Total drugs: 47.0 (34.9) vs 3.8 (6.2)</p> <p><i>Medicaid: Probable LGS patients vs control</i><br/>           (p&lt;0.0001 for all comparisons)<br/>           Inpatient admissions: 0.6 (0.9) vs 0.1 (0.3)<br/>           ED visits w/o Admission: 1.4 (2.1) vs 0.6 (1.2)<br/>           Hospital OP visits: 6.1 (14.8) vs 0.9 (3.3)<br/>           Physician visits: 8.0 (10.0) vs 3.4 (6.6)<br/>           Other OP: 48.9 (81.5) vs 7.0 (23.6)<br/>           Home health: 81.2 (126.0) vs 2.8 (22.4)<br/>           Equipment/ supply: 2.5 (6.0) vs 0.2 (1.0)<br/>           ASMs: 28.4 (16.1) vs 0.1 (1.0)<br/>           Rescue ASMs: 1.9 (4.2) vs 0.0 (0.1)<br/>           Other drugs: 35.6 (40.2) vs 8.2 (15.8)<br/>           Total services: 148.6 (156.1) vs 14.9 (37.0)<br/>           Total drugs: 66.0 (48.0) vs 8.3 (16.2)</p> | <p><i>Mean (SD) in LGS vs control (PPPY)</i></p> <p><i>Commercial: Probable LGS patients vs control</i><br/>           (p&lt;0.0001 for all comparisons)<br/>           Inpatient admissions: \$22,907 (50,800) vs \$460 (6482)<br/>           ED visits w/o Admission: \$2149 (4602) vs \$275 (813)<br/>           Hospital OP visits: \$10,330 (23,548) vs \$541 (2123)<br/>           Physician visits: \$2966 (10,552) vs \$585 (870)<br/>           Other OP: \$2283 (7,160) vs \$181 (652)<br/>           Home health: \$8569 (38,148) vs \$19 (340)<br/>           Equipment/ supply: \$1843 (5,044) vs \$20 (192)<br/>           ASMs: \$8531 (13,667) vs \$1 (14)<br/>           Rescue drugs: \$755 (3071) vs \$0 (0)<br/>           Other drugs: \$4693 (18,306) vs \$361 (1433)<br/>           Total services: \$51,047 (83,203) vs \$2081 (7639)<br/>           Total drugs: \$13,979 (23,999) vs \$362 (1433)<br/>           Total cost: \$65,026 (91,006) vs \$2442 (7950)</p> <p><i>Medicaid: Probable LGS patients vs control</i><br/>           (p&lt;0.0001 for all comparisons)<br/>           Inpatient admissions: \$12,815 (40,250) vs \$870 (8288)<br/>           ED visits w/o Admission: \$838 (1852) vs \$230 (728)<br/>           Hospital OP visits: \$3526 (16,811) vs \$304 (1,242)<br/>           Physician visits: \$836 (2087) vs \$277 (802)<br/>           Other OP: \$9362 (24,471) vs \$825 (3,839)<br/>           Home health: \$23,725 (42,365) vs \$610 (4748)<br/>           Equipment/ supply: \$1334 (2683) vs \$31 (385)<br/>           ASMs: \$6566 (11,869) vs \$3 (77)<br/>           Rescue drugs: \$809 (2520) vs \$0 (4)<br/>           Other drugs: \$4118 (15,818) vs \$699 (4482)<br/>           Total services: \$52,437 (69,462) vs \$3147 (11,487)<br/>           Total drugs: \$11,493 (21,684) vs \$702 (4485)</p> |

| Study, country & type of study                                                                                   | Patient population                                                                                                                                                                     | Healthcare resource                                                                                                                                                                                                                                                                                                                                                                                                                                                                                                                                                                                                                                                                                                                                                                                                                                                                                                                                                                              | Costs                                                                                                                                                                                                                                                                                                                                                                                                                                                                                                                                                                                                                                                                                                                                                                                                                                                                                                                                                                                                                                                                                                                                                                                                                                                                                                                                                                                                                                                                                                              |
|------------------------------------------------------------------------------------------------------------------|----------------------------------------------------------------------------------------------------------------------------------------------------------------------------------------|--------------------------------------------------------------------------------------------------------------------------------------------------------------------------------------------------------------------------------------------------------------------------------------------------------------------------------------------------------------------------------------------------------------------------------------------------------------------------------------------------------------------------------------------------------------------------------------------------------------------------------------------------------------------------------------------------------------------------------------------------------------------------------------------------------------------------------------------------------------------------------------------------------------------------------------------------------------------------------------------------|--------------------------------------------------------------------------------------------------------------------------------------------------------------------------------------------------------------------------------------------------------------------------------------------------------------------------------------------------------------------------------------------------------------------------------------------------------------------------------------------------------------------------------------------------------------------------------------------------------------------------------------------------------------------------------------------------------------------------------------------------------------------------------------------------------------------------------------------------------------------------------------------------------------------------------------------------------------------------------------------------------------------------------------------------------------------------------------------------------------------------------------------------------------------------------------------------------------------------------------------------------------------------------------------------------------------------------------------------------------------------------------------------------------------------------------------------------------------------------------------------------------------|
|                                                                                                                  |                                                                                                                                                                                        |                                                                                                                                                                                                                                                                                                                                                                                                                                                                                                                                                                                                                                                                                                                                                                                                                                                                                                                                                                                                  | Total costs: \$63,930 (76,929) vs \$3849 (13,703)                                                                                                                                                                                                                                                                                                                                                                                                                                                                                                                                                                                                                                                                                                                                                                                                                                                                                                                                                                                                                                                                                                                                                                                                                                                                                                                                                                                                                                                                  |
| Reaven 2019 [42]<br>(LGS seizure events vs no events<br>USA<br>(Full)<br>Retrospective insurance claims analysis | Probable LGS:<br><i>Commercial:</i> Patients with seizure events (N=1258) vs no seizure events (N=1011)<br><i>Medicaid:</i> Patients with seizure events (N=2192) vs no event (N=1538) | <i>Mean (SD) in LGS patients with events vs no events (PPPY)</i><br><i>Commercial:</i><br>Inpatient admissions: 1.1 (1.3) vs 0.3 (0.5)<br>ED visits: 1.7 (1.9) vs 0.3 (0.6)<br>Hospital OP visits: 10.1 (25.2) vs 5.9 (17.4)<br>Physician visits: 15.4 (21.9) vs 11.1 (15.8)<br>Other OP: 10.9 (20.8) vs 8.0 (17.9)<br>Home health: 18.1 (50.2) vs 13.8 (42.1)<br>Equipment/ supply: 4.5 (10.1) vs 3.4 (8.1)<br>ASMs: 24.4 (15.1) vs 21.6 (13.7)<br>Rescue ASMs: 2.0 (5.1) vs 0.9 (3.1)<br>Other drugs: 24.9 (28.5) vs 19.2 (22.2)<br><i>Medicaid:</i><br>Inpatient admissions: 0.8 (1.4) vs 0.2 (0.4)<br>ED visits: 2.1 (2.4) vs 0.4 (0.0)<br>Hospital OP visits: 7.4 (17.0) vs 4.4 (11.0)<br>Physician visits: 9.0 (10.8) vs 6.6 (8.0)<br>Other OP: 48.6 (81.8) vs 49.7 (81.5)<br>Home health: 76.5 (122.7) vs 88.7 (130.6)<br>Equipment/ supply: 2.7 (6.4) vs 2.3 (5.5)<br>ASMs: 29.1 (16.4) vs 27.7 (15.0)<br>Rescue ASMs: 2.3 (4.5) vs 1.3 (3.6)<br>Other drugs: 37.2 (41.9) vs 33.6 (37.8) | <i>Mean (SD) in LGS patients with events vs no events (PPPY)</i><br><i>Commercial:</i><br>Inpatient admissions: \$34,929 (67,542) vs \$9555 (33,644)<br>ED visits: \$3469 (5748) vs \$505 (1241)<br>Hospital OP visits: \$12,841 (27,857) vs \$7491 (18,874)<br>Physician visits: \$3483 (12,874) vs \$2337 (6550)<br>Other OP: \$2917 (8837) vs \$1546 (4253)<br>Home health: \$9722 (39,765) vs \$7215 (36,046)<br>Equipment/ supply: \$1994 (5502) vs \$1663 (4403)<br>ASMs: \$9144 (14,464) vs \$7756 (12,559)<br>Rescue drugs: \$974 (3395) vs \$482 (2585)<br>Other drugs: \$5467 (18,431) vs \$3742 (18,096)<br>Total services: \$69,354 (101,479) vs \$30,311 (63,955)<br>Total drugs: \$15,585 (25,239) vs \$11,980 (22,184)<br>Total costs: \$84,939 (109,786) vs \$42,292 (69,147)<br><i>Medicaid:</i><br>Inpatient admissions: \$20,681 (61,771) vs \$5318 (43,352)<br>ED visits: \$1272 (1898) vs \$214 (1493)<br>Hospital OP visits: \$4208 (20,956) vs \$2551 (4756)<br>Physician visits: \$962 (2440) vs \$724 (1890)<br>Other OP: \$9144 (25,210) vs \$8952 (21,809)<br>Home health: \$21,492 (39,840) vs \$26,191 (44,588)<br>Equipment/ supply: \$1346 (2661) vs \$1378 (2763)<br>ASMs: \$6914 (12,982) vs \$5882 (9672)<br>Rescue drugs: \$980 (2640) vs \$574 (2334)<br>Other drugs: \$4512 (18,923) vs \$3655 (9407)<br>Total services: \$59,106 (86,008) vs \$45,329 (67,406)<br>Total drugs: \$12,406 (25,184) vs \$10,110 (14,824)<br>Total costs: \$71,512 (94,213) vs \$55,439 (71,687) |
| Reaven 2019 [42]<br>(LGS vs other DEEs)<br>USA<br>(Full)<br>Retrospective insurance claims analysis              | <i>Commercial:</i> Probable LGS (N=2269) vs DS (N=321) vs TSC (N=1622)<br><br><i>Medicaid:</i> Probable LGS (N=3730) vs DS (N=668) vs TSC (N=1144)                                     | <i>Mean (SD) in probable LGS vs DS vs TSC (PPPY)</i><br><i>Commercial:</i><br>Inpatient admissions: 0.7 (1.1) vs 0.5 (0.8) vs 0.2 (0.4)<br>ED visits: 1.1 (1.6) vs 1.0 (1.5) vs 0.4 (0.9)<br>Hospital OP visits: 8.2 (22.2) vs 7.0 (20.3) vs 3.0 (5.9)<br>Physician visits: 13.5 (19.6) vs 10.7 (11.5) vs 9.1 (12.7)<br>Other OP: 9.6 (19.6) vs 9.1 (20.1) vs 5.8 (15.1)<br>Home health: 16.2 (46.8) vs 5.7 (20.0) vs 1.2 (10.6)<br>Equipment/ supply: 4.0 (9.3) vs 1.0 (3.0) vs 0.4 (1.8)<br>ASMs: 23.1 (14.5) vs 18.9 (11.5) vs 5.4 (9.9)<br>Rescue ASMs: 1.5 (4.4) vs 1.0 (3.2) vs 0.1 (0.6)<br>Other drugs: 22.3 (26.1) vs 15.0 (16.3) vs 11.4 (17.1)<br><i>Medicaid:</i><br>Inpatient admissions: 0.6 (1.0) vs 0.4 (0.7) vs 0.3 (0.7)<br>ED visits: 1.4 (2.1) vs 1.4 (2.1) vs 1.0 (1.9)                                                                                                                                                                                                     | <i>Mean (SD) in probable LGS vs DS vs TSC (PPPY)</i><br><i>Commercial:</i><br>Inpatient admissions: \$23,623 (56,494) vs \$10,847 (28,133) vs \$5226 (19,684)<br>ED visits: \$2148 (4601) vs \$1811 (3290) vs \$902 (2892)<br>Hospital OP visits: \$10,458 (24,409) vs \$5769 (11,643) vs \$4951 (9795)<br>Physician visits: \$2972 (10,549) vs \$2154 (3255) vs \$1885 (4828)<br>Other OP: \$2306 (7197) vs \$1817 (4479) vs \$1210 (9963)<br>Home health: \$8605 (38,165) vs \$1540 (8445) vs \$475 (7116)<br>Equipment/ supply: \$1846 (5044) vs \$438 (1644) vs \$141 (1230)<br>ASMs: \$8526 (13,662) vs \$4130 (5375) vs \$3087 (12,019)<br>Rescue drugs: \$755 (3070) vs \$516 (2013) vs \$64 (390)                                                                                                                                                                                                                                                                                                                                                                                                                                                                                                                                                                                                                                                                                                                                                                                                          |

| Study, country & type of study                                                   | Patient population                                                    | Healthcare resource                                                                                                                                                                                                                                                                                                                                                                                                                                              | Costs                                                                                                                                                                                                                                                                                                                                                                                                                                                                                                                                                                                                                                                                                                                                                                                                                                                                                                                                                                                                                                                                                                                                                                                                                                                      |
|----------------------------------------------------------------------------------|-----------------------------------------------------------------------|------------------------------------------------------------------------------------------------------------------------------------------------------------------------------------------------------------------------------------------------------------------------------------------------------------------------------------------------------------------------------------------------------------------------------------------------------------------|------------------------------------------------------------------------------------------------------------------------------------------------------------------------------------------------------------------------------------------------------------------------------------------------------------------------------------------------------------------------------------------------------------------------------------------------------------------------------------------------------------------------------------------------------------------------------------------------------------------------------------------------------------------------------------------------------------------------------------------------------------------------------------------------------------------------------------------------------------------------------------------------------------------------------------------------------------------------------------------------------------------------------------------------------------------------------------------------------------------------------------------------------------------------------------------------------------------------------------------------------------|
|                                                                                  |                                                                       | Hospital OP visits: 6.1 (14.9) vs 3.8 (8.3) vs 3.8 (6.8)<br>Physician visits: 8.0 (10.0) vs 6.4 (9.4) vs 7.5 (16.3)<br>Other OP: 49.1 (81.0) vs 43.1 (84.2) vs 44.9 (90.2)<br>Home health: 81.5 (126.2) vs 44.4 (97.8) vs 34.0 (84.2)<br>Equipment/ supply: 2.5 (6.0) vs 0.7 (2.7) vs 0.8 (2.7)<br>ASMs: 28.5 (16.1) vs 21.3 (13.1) vs 11.6 (14.9)<br>Rescue ASMs: 1.9 (4.2) vs 1.0 (2.4) vs 0.4 (1.2)<br>Other drugs: 35.7 (40.3) vs 27.7 (35.9) vs 26.6 (37.6) | Other drugs: \$4698 (18,299) vs \$2411 (8020) vs \$2965 (14,713)<br>Total services: \$51,958 (88,914) vs \$24,376 (38,308) vs \$14,790 (32,935)<br>Total drugs: \$13,979 (23,987) vs \$7057 (9962) vs \$6117 (20,148)<br>Total costs: \$65,937 (96,223) vs \$31,433 (41,835) vs \$20,907 (40,657)<br><i>Medicaid:</i><br>Inpatient admissions: \$14,346 (55,442) vs \$5694 (23,135) vs \$4062 (17,487)<br>ED visits: \$836 (1819) vs \$810 (1647) vs \$520 (1482)<br>Hospital OP visits: \$3525 (16,371) vs \$1728 (1647) vs \$2086 (5299)<br>Physician visits: \$864 (2233) vs \$574 (961) vs \$767 (3448)<br>Other OP: \$9065 (23,864) vs \$7566 (20,646) vs \$8178 (23,402)<br>Home health: \$23,430 (41,921) vs \$10,390 (26,767) vs \$8061 (23,815)<br>Equipment/ supply: \$1359 (2703) vs \$276 (1076) vs \$203 (931)<br>ASMs: \$6488 (11,740) vs \$2488 (4440) vs \$3150 (10,815)<br>Rescue drugs: \$813 (2526) vs \$360 (1038) vs \$142 (626)<br>Other drugs: \$4159 (15,717) vs \$1998 (4726) vs \$4115 (18,875)<br>Total services: \$53,425 (79,152) vs \$27,039 (42,876) vs \$23,878 (38,111)<br>Total drugs: \$11,460 (21,552) vs \$4845 (6904) vs \$7407 (23,252)<br>Total costs: \$64,885 (86,000) vs \$31,884 (45,174) vs \$31,284 (46,777) |
| Stockl 2019 [45]<br>USA<br>(Abstract)<br>Retrospective insurance claims analysis | Probable LGS:<br><i>Commercial</i> (N=2520), <i>Medicaid</i> (N=4613) | Hospitalizations by healthplan:<br>Epilepsy-related index-hospitalizations: 46–58%<br>Pneumonia-related index hospitalizations: 6–7%<br>Injury-related index-hospitalizations: 2%*<br>ICU use: 31%*<br>Mean (SD) LOS ICU vs non-ICU use: 8.0 (16.8) vs 4.0 (7.9) days*<br>* Data are for all patients (LGS+DS+TSC)                                                                                                                                               | NR                                                                                                                                                                                                                                                                                                                                                                                                                                                                                                                                                                                                                                                                                                                                                                                                                                                                                                                                                                                                                                                                                                                                                                                                                                                         |
| Stockl 2019 [44]<br>USA<br>(Abstract)<br>Retrospective insurance claims analysis | Probable LGS (N=1296) vs probable DS (N=183) vs other DEEs (N=6717)   | <i>Commercial:</i> Probable LGS vs probable DS vs other DEEs<br>Number of distinct ASMs during the 12-month pre-index period: 3.4 vs 2.6 vs 2.1                                                                                                                                                                                                                                                                                                                  | <i>Commercial:</i> Probable LGS vs probable DS vs other DEEs<br>Mean costs 12-month post-index following each patient's earliest diagnosis or ASM claim (index date)                                                                                                                                                                                                                                                                                                                                                                                                                                                                                                                                                                                                                                                                                                                                                                                                                                                                                                                                                                                                                                                                                       |

| Study, country & type of study                                                      | Patient population                                                                                      | Healthcare resource                                                                                                                                                                                                                                                                                                                                                                                                                                                                                                                                                                                                                                                                                                                                                                                                                                       | Costs                                                                                                                                                                                                                                                                                                                                                                                                                                                                                                                                                                                                                                                                                                                                                                                                                                                                                                                                                                                                                                                                                                                                                    |
|-------------------------------------------------------------------------------------|---------------------------------------------------------------------------------------------------------|-----------------------------------------------------------------------------------------------------------------------------------------------------------------------------------------------------------------------------------------------------------------------------------------------------------------------------------------------------------------------------------------------------------------------------------------------------------------------------------------------------------------------------------------------------------------------------------------------------------------------------------------------------------------------------------------------------------------------------------------------------------------------------------------------------------------------------------------------------------|----------------------------------------------------------------------------------------------------------------------------------------------------------------------------------------------------------------------------------------------------------------------------------------------------------------------------------------------------------------------------------------------------------------------------------------------------------------------------------------------------------------------------------------------------------------------------------------------------------------------------------------------------------------------------------------------------------------------------------------------------------------------------------------------------------------------------------------------------------------------------------------------------------------------------------------------------------------------------------------------------------------------------------------------------------------------------------------------------------------------------------------------------------|
|                                                                                     |                                                                                                         |                                                                                                                                                                                                                                                                                                                                                                                                                                                                                                                                                                                                                                                                                                                                                                                                                                                           | <p>All-cause total healthcare costs: \$80,545 vs \$77,914 vs \$43,794</p> <p>All-cause medical costs: \$56,527 vs \$63,850 vs \$32,403</p> <p>-Proportion epilepsy related costs: 71.2% vs 80.5% vs 62.5%</p> <p>Pharmacy costs: \$24,018 vs \$14,064 vs \$11,391</p> <p>-Proportion ASM costs: 72.6% vs 70.8% vs 65.8%</p>                                                                                                                                                                                                                                                                                                                                                                                                                                                                                                                                                                                                                                                                                                                                                                                                                              |
| Hollenack 2019 [41]<br>USA<br>(Abstract)<br>Retrospective insurance claims analysis | Probable LGS (N=5186) vs probable DS (N=504) vs other DEEs (N=9453)                                     | <p><i>Medicaid:</i> Probable LGS vs probable DS vs other DEEs</p> <p>Number of distinct ASMs during the 12-month pre-index period: 2.4 vs 2.3 vs 2.2</p>                                                                                                                                                                                                                                                                                                                                                                                                                                                                                                                                                                                                                                                                                                  | <p><i>Medicaid:</i> Probable LGS vs probable DS vs other DEEs</p> <p>Mean costs 12-month post-index following each patient's earliest diagnosis or ASM claim (index date)</p> <p>All-cause total healthcare costs: \$49,304 vs \$31,342 vs \$33,183</p> <p>All-cause medical costs: \$36,356 vs \$22,790 vs \$23,650</p> <p>-Proportion epilepsy related costs: 31.5% vs 27.3% vs 48.0%</p> <p>Pharmacy costs: \$12,948 vs \$8,551 vs \$9,533</p> <p>-Proportion ASM costs: 67.3%, 62.8%, 52.3%</p>                                                                                                                                                                                                                                                                                                                                                                                                                                                                                                                                                                                                                                                      |
| François 2017 [40]<br>USA<br>(Full)<br>Retrospective insurance claims analysis      | LGS (prior to clobazam initiation)<br><i>Commercial and medicare</i> (N=1384), <i>Medicaid</i> (N=1365) | <p><i>Mean (SD)) in commercial &amp; medicaid (PPPY)</i></p> <p><i>Seizure related</i></p> <p>Hospitalization: 0.4 (0.8) &amp; 0.3 (0.8)</p> <p>-LOS, days: 1.4 (4.7) &amp; 1.4 (6.0)</p> <p>ED visits: 0.5 (1.0) &amp; 0.9 (1.8)</p> <p>Physician office visits: 2.2 (2.3) &amp; 2.1 (2.2)</p> <p>Laboratory visits: 0.3 (0.9) &amp; 0.3 (0.9)</p> <p>Radiology visits: 0.1 (0.3) &amp; 0.1 (0.4)</p> <p>Other outpatient: 1.8 (11.5) &amp; 4.7 (27.6)</p> <p><i>All cause</i></p> <p>Hospitalization: 1.2 (1.8) &amp; 1.1 (2.0)</p> <p>-LOS, days: 6.5 (18.2) &amp; 6.7 (19.8)</p> <p>ED visits: 2.1 (3.2) &amp; 3.4 (5.2)</p> <p>Physician office visits: 10.2 (7.6) &amp; 8.9 (7.2)</p> <p>Laboratory visits: 1.9 (3.0) &amp; 1.8 (3.5)</p> <p>Radiology visits: 1.4 (2.9) &amp; 1.0 (1.7)</p> <p>Other outpatient: 18.1 (31.3) &amp; 63.9 (87.7)</p> | <p><i>Mean (SD)) in commercial &amp; medicaid (PPPY)</i></p> <p><i>Seizure related</i></p> <p>Total: \$12,709 (36,420) &amp; \$7687 (25,092)</p> <p>Medical: \$10,563 (35,194) &amp; \$5951 (24,374)</p> <p>-Hospitalization: \$7366 (30,951) &amp; \$4108 (22,651)</p> <p>-ED visits: \$793 (2314) &amp; \$353 (979)</p> <p>-Physician office visits: \$562 (1438) &amp; \$246 (699)</p> <p>-Laboratory visits: \$82 (621) &amp; \$16 (98)</p> <p>-Radiology visits: \$126 (632) &amp; \$43 (212)</p> <p>-Other outpatient: \$1634 (11,555) &amp; \$1186 (8086)</p> <p>Prescription: \$2146 (5596) &amp; \$1736 (4262)</p> <p><i>All cause</i></p> <p>Medical: \$43,866 (86,376) &amp; \$34,292 (68,737)</p> <p>-Hospitalization: \$24,727 (70,535) &amp; \$14,498 (58,921)</p> <p>-ED visits: \$4671 (9646) &amp; \$2036 (4009)</p> <p>-Physician office visits: \$2841 (5036) &amp; \$1579 (2738)</p> <p>-Laboratory visits: \$369 (1163) &amp; \$101 (253)</p> <p>-Radiology visits: \$930 (3911) &amp; \$224 (586)</p> <p>-Other outpatient: \$10,329 (27,363) &amp; \$15,854 (28,874)</p> <p>Prescription: \$5766 (18,940) &amp; \$4078 (7315)</p> |

ASM, anti-seizure medication; DEE, developmental and epileptic encephalopathy; DS, Dravet syndrome; ED, emergency department; ICU, intensive care unit; LGS, Lennox-Gastaut syndrome; LOS, length of stay; NA, non-applicable; OP, outpatient; PPPY, per person per year; SD, standard deviation; TSC, tuberous sclerosis complex

Table S2: Quality assessment checklist for prevalence studies

|                                                                                                                                                            | Strzelczyk<br>2021 [36]<br>(Full) | Chin<br>2021<br>[29]<br>(Full) | Hollenack<br>2019 [30]<br>(Abstract) | MADDS study<br>Trevathan<br>1997 [33]<br>(Full) | Sidenvall<br>1996 [32]<br>(Full) | Rantala 1999<br>[31]<br>(Full) | Heiskala<br>1997 [34]<br>(Full) | Beilmann<br>1999 [28]<br>(Full) |
|------------------------------------------------------------------------------------------------------------------------------------------------------------|-----------------------------------|--------------------------------|--------------------------------------|-------------------------------------------------|----------------------------------|--------------------------------|---------------------------------|---------------------------------|
| Was the study's target population a close representation of the national population in relation to relevant variables, e.g. age, sex, occupation?          | 0                                 | 0                              | 0                                    | 0                                               | 1                                | 1                              | 1                               | 0                               |
| Was the sampling frame a true or close representation of the target population?                                                                            | 0                                 | 0                              | 0                                    | 1                                               | 1                                | 1                              | 1                               | 1                               |
| Was some form of random selection used to select the sample, OR, was a census undertaken?                                                                  | 0                                 | 0                              | 0                                    | 1                                               | 1                                | 1                              | 1                               | 1                               |
| Was the likelihood of non-response bias minimal?                                                                                                           | 1                                 | 1                              | 1                                    | 1                                               | 1                                | 1                              | 1                               | 1                               |
| Were data collected directly from the subjects (as opposed to a proxy)?                                                                                    | 0                                 | 0                              | 0                                    | 1                                               | 1                                | 1                              | 1                               | 1                               |
| Was an acceptable case definition used in the study?                                                                                                       | 1                                 | 1                              | 1                                    | 1                                               | 1                                | 1                              | 1                               | 1                               |
| Was the study instrument that measured the parameter of interest (e.g. prevalence of low back pain) shown to have reliability and validity (if necessary)? | 2                                 | 2                              | 2                                    | 1                                               | 1                                | 1                              | 1                               | 1                               |
| Was the same mode of data collection used for all subjects?                                                                                                | 0                                 | 0                              | 0                                    | 1                                               | 1                                | 1                              | 1                               | 1                               |
| Were the numerator(s) and denominator(s) for the parameter of interest appropriate?                                                                        | 1                                 | 1                              | 1                                    | 1                                               | 1                                | 1                              | 1                               | 1                               |
| Overall risk of bias<br>Low risk=0-6<br>Moderate =7-12<br>High =13-18                                                                                      | 5=low                             | 5=low                          | 5=low                                | 8=moderate                                      | 9=moderate                       | 9=moderate                     | 9=moderate                      | 8=moderate                      |

From Hoy et al [24]; 0=low risk; 1= moderate/unclear; 2=high risk

Table S3: Quality assessment checklist of cost-of-illness studies

|                                                                                     | Piña-Garza 2017 [35] | Strzelczyk 2021 [36] (Full) | Chin 2021 [29] (Full) | Reaven 2018 [43] (Full) | Reaven 2019 [42] (Full) | Stockl 2019 [45] (Abstract) | Stockl 2019 [44] (Abstract) | Hollenack 2019 [41] (Abstract) | François 2017 [40] (Full) |
|-------------------------------------------------------------------------------------|----------------------|-----------------------------|-----------------------|-------------------------|-------------------------|-----------------------------|-----------------------------|--------------------------------|---------------------------|
| Was a clear definition of the illness given?                                        | P                    | P                           | P                     | P                       | P                       | P                           | P                           | P                              | P                         |
| Were epidemiological sources carefully described?                                   | 1                    | 1                           | 1                     | 1                       | 1                       | 1                           | 1                           | 1                              | 1                         |
| Were direct/indirect costs/ resource sufficiently disaggregated?                    | P                    | P                           | P                     | P                       | P                       | P                           | P                           | P                              | P                         |
| Were activity data sources carefully described?                                     | 1                    | 1                           | 1                     | 1                       | 1                       | P                           | P                           | P                              | 1                         |
| Were activity data appropriately assessed?                                          | 1                    | 1                           | 1                     | 1                       | 1                       | P                           | P                           | P                              | 1                         |
| Were the sources of all cost values analytically described?                         | P                    | P                           | P                     | P                       | P                       | 0                           | 0                           | 0                              | P                         |
| Were unit costs appropriately valued?                                               | 1                    | 1                           | 1                     | 1                       | 1                       | 1                           | 1                           | 1                              | 1                         |
| Were the methods adopted carefully explained?                                       | 1                    | 1                           | 1                     | 1                       | 1                       | 0                           | 0                           | 0                              | 1                         |
| Were the major assumptions tested in a sensitivity analysis?                        | 0                    | 0                           | 0                     | 0                       | 0                       | 0                           | 0                           | 0                              | 0                         |
| Was the presentation of study results consistent with the methodology of the study? | 1                    | 1                           | 1                     | 1                       | 1                       | 1                           | 1                           | 1                              | 1                         |
| Total score by study                                                                |                      |                             |                       |                         |                         |                             |                             |                                |                           |
| YES(1)=low risk                                                                     | 6                    | 6                           | 6                     | 6                       | 6                       | 3                           | 3                           | 3                              | 6                         |
| NO(0)=high risk                                                                     | 1                    | 1                           | 1                     | 1                       | 1                       | 3                           | 3                           | 3                              | 1                         |
| PARTIALLY(p)=moderate risk                                                          | 3                    | 3                           | 3                     | 3                       | 3                       | 4                           | 4                           | 4                              | 3                         |

From Molinier et al.[26] Mostly 1=low risk; P= moderate/unclear; 0=high risk

Table S4: Quality assessment checklist for qualitative HRQoL studies

|                                                                                                                                                                   | Appraisal/score                                                                      | Gallop 2010 [55] (Full) | Murray 1993 [49] (Full) | Gibson 2014 [48] (Full) |
|-------------------------------------------------------------------------------------------------------------------------------------------------------------------|--------------------------------------------------------------------------------------|-------------------------|-------------------------|-------------------------|
| Addresses a research question closely related to our review aims                                                                                                  | Yes/No<br>Only "yes" can be grade I or II                                            | Yes                     | Yes                     | Yes                     |
| Qualitative methods are appropriate for the research question                                                                                                     | Yes=3<br>No=0                                                                        | 3                       | 3                       | 3                       |
| Details of caregiver (relationship to patient, age, gender) and patient features (age, seizure frequency/ disease severity) reported                              | Both caregiver and patient = 3<br>Only one = 1<br>Neither = 0                        | 3                       | 0                       | 0                       |
| Methods described in sufficient detail (e.g., how participants were recruited, what did the interview guide ask, etc.)                                            | Yes = 3<br>Partial = 1<br>No = 0                                                     | 3                       | 1                       | 1                       |
| Analysis described in sufficient detail (analysis approach e.g., grounded theory/thematic analysis, analysis procedures, saturation assessed) [yes/no score: 0/2] | Yes = 3<br>Partial = 1<br>No = 0                                                     | 3                       | 1                       | 1                       |
| Caregiver quotes included                                                                                                                                         | Yes = 1<br>No = 0                                                                    | 1                       | 1                       | 1                       |
| Reports ethical review/approval                                                                                                                                   | Yes = 1<br>No = 0                                                                    | 1                       | 0                       | 0                       |
| Evidence of obvious bias in methodology (e.g., recruitment bias, focused on one treatment)                                                                        | No obvious bias = 3<br>Some evidence of bias = 1<br>Several sources of bias = 0      | 1                       | 1                       | 1                       |
| Total score range                                                                                                                                                 | 13–17 Grade I (if 'yes' to first question)<br><br>8–12 Grade II<br><br>0–7 Grade III | Grade I                 | Grade III               | Grade III               |

From Gallop et al [27] Grade I= highest methodological and reporting quality; Grade 2= moderate-high methodological and reporting quality; Grade 3= limitations in their methodological and reporting quality

Table S5: HRQoL: Quality assessment checklist for quantitative HRQoL studies

|                                                                        | Appraisal/score                                                                                  | Auvin 2021 [50] (Full) | Radu 2019 [51] (Abstract) | Gallop 2010 [55] (Full) |
|------------------------------------------------------------------------|--------------------------------------------------------------------------------------------------|------------------------|---------------------------|-------------------------|
| Addresses a research question closely related to our review aims       | Yes/No<br>Only "yes" can be grade I or II                                                        | Yes                    | Yes                       | Yes                     |
| Validated questionnaires (e.g., EQ-5D, ZBI, CarerQoL, SF-36, GAD, BDI) | Validated questionnaires = 3<br>Well-described bespoke survey = 1<br>Poorly described survey = 0 | 1                      | 1                         | 3                       |
| Good sample size                                                       | 50+=3                                                                                            | 3                      | 1                         | 1                       |

|                                                                                                                                      | Appraisal/score                                                                      | Auvin 2021 [50]<br>(Full) | Radu 2019 [51]<br>(Abstract) | Gallop 2010 [55]<br>(Full) |
|--------------------------------------------------------------------------------------------------------------------------------------|--------------------------------------------------------------------------------------|---------------------------|------------------------------|----------------------------|
|                                                                                                                                      | 25–50=1<br>Less than 25=0                                                            |                           |                              |                            |
| Details of caregiver (relationship to patient, age, gender) and patient features (age, seizure frequency/ disease severity) reported | Both caregiver and patient = 3<br>Only one = 1<br>Neither = 0                        | 1                         | 0                            | 3                          |
| Appropriate statistical reporting                                                                                                    | Yes = 1<br>No = 0                                                                    | 1                         | 1                            | 1                          |
| Reports ethical review/approval                                                                                                      | Yes = 1<br>No = 0                                                                    | 1                         | 0                            | 1                          |
| Evidence of obvious bias in methodology (e.g., recruitment bias, focused on one treatment)                                           | No obvious bias = 3<br>Some evidence of bias = 1<br>Several sources of bias = 0      | 1                         | 1                            | 1                          |
| Total score range                                                                                                                    | 11–14 Grade I (if 'yes' to first question)<br><br>7–10 Grade II<br><br>0–6 Grade III | Grade II                  | Grade III                    | Grade II                   |

From Gallop et al [27] Grade I= highest methodological and reporting quality; Grade 2= moderate-high methodological and reporting quality; Grade 3= limitations in their methodological and reporting quality
